# Supplementary material for: Analysis of the anthropogenic effect on the Silencio River in Salvador Escalante, Michoacán, México
Source: PeerJ. 2025 Jan 13;13:e18531. doi: 10.7717/peerj.18531 (PMC11737336; doi:10.7717/peerj.18531)
Supplement: Supplemental Information 1 [file peerj-13-18531-s001.xlsx]

## Sheet: Hoja1
Order	Experiment Run	PtCentral	Block	Cd	Cu	Hg	Pb	DQO0	DQO6	DQO18	DQO40	DQO96	pH0	pH1	pH2	pH4	conduc0	conduc1	conduc2	conduc3	OD0	OD5	OD10	OD15	OD20	SS0	SS1	SS2	SS3
20	1	0	1	0.1	4	0.008	2	285	219	169	159	152	7.31	8.22	8.02	8.1	695	551	578	551	5.6	4.48	1.64	1.12	0.64	35	40	60	62			1.527
19	2	0	1	0.1	4	0.008	2	285	219	172	165	81	7.31	8	7.54	7.98	695	552	559	568	5.55	3.46	2.74	2.02	1.16	35	40	60	62			1.527
16	3	1	1	0.15	5	0.01	3	285	201	137	107	74	7.31	8.06	8.02	8.23	695	553	557	573	5.43	4.42	2.15	1.11	0.57	35	40	58	62			2.04
13	4	1	1	0.05	3	0.01	3	325	300	262	171	132	7.31	8.19	8.28	8.21	695	548	558	566	5.48	3.74	3.54	3.45	2.91	35	60	58	64			1.515
1	5	1	1	0.05	3	0.006	1	325	350	247	203	106	7.31	8.25	8.38	8.12	695	617	610	609	5.61	2.87	2.64	2.4	0.78	35	52	56	54			1.014
6	6	1	1	0.15	3	0.01	1	285	373	139	98	79	7.31	8.16	8.33	7.87	695	542	561	582	5.59	2.42	1.43	0.87	0.53	35	60	68	60			1.04
2	7	1	1	0.15	3	0.006	1	285	241	192	151	107	7.31	8	8.32	8.51	695	613	629	640	6.09	3.5	3.31	3.08	2.86	35	58	72	60			1.039
8	8	1	1	0.15	5	0.01	1	285	331	313	233	101	7.31	8.22	8.24	7.9	695	607	620	614	5.33	3.89	3.53	3.22	2.87	35	60	62	50			1.54
11	9	1	1	0.05	5	0.006	3	285	270	193	184	107	7.31	8.02	8.34	8.08	695	622	616	596	6.07	2.68	2.33	2.04	1.64	35	64	58	58			2.014
10	10	1	1	0.15	3	0.006	3	285	219	210	213	128	7.31	8.02	8.36	8.09	695	610	620	626	5.7	3.47	3.19	2.96	2.67	35	62	58	58			1.539
18	11	0	1	0.1	4	0.008	2	285	219	170	163	124	7.31	8.13	7.98	8.04	695	552	566	560	5.55	4.08	2.13	1.53	1.04	35	46	58	60			1.527
15	12	1	1	0.05	5	0.01	3	282	294	194	260	167	7.13	8.05	8.07	7.78	585	540	530	536	5.65	4.5	4.05	3.66	3.05	35	60	60	70			2.015
9	13	1	1	0.05	3	0.006	3	282	340	262	297	124	7.13	8	8.01	7.88	585	528	484	493	5.71	3.81	3.28	2.92	2.54	35	64	60	70			1.514
5	14	1	1	0.05	3	0.01	1	282	204	203	156	140	7.13	7.8	8.1	7.96	585	547	514	526	5.61	3	1.85	0.96	0.44	35	68	72	74			1.015
4	15	1	1	0.15	5	0.006	1	282	258	245	189	149	7.13	7.96	8.12	7.98	585	539	509	512	5.4	4.78	4.34	3.96	3.58	35	70	70	80			1.539
12	16	1	1	0.15	5	0.006	3	282	273	173	161	156	7.13	8.03	8.07	7.95	585	530	517	508	4.15	2.76	2.05	1.38	0.96	35	80	72	80			2.039
7	17	1	1	0.05	5	0.01	1	282	282	182	330	218	7.13	8	7.9	7.82	585	517	496	501	5.31	4.34	4	3.65	3.28	35	60	54	58			1.515
21	18	0	1	0.1	4	0.008	2	282	211	155	180	185	7.13	7.72	7.99	7.96	585	543	544	510	5.67	3.54	2.77	2.17	1.54	35	70	72	70			1.527
17	19	0	1	0.1	4	0.008	2	282	223	211	378	154	7.13	7.95	8.01	7.78	585	528	524	493	5.43	3.94	3.79	3.73	3.62	35	70	72	72			1.527
3	20	1	1	0.05	5	0.006	1	282	310	172	367	160	7.13	7.99	7.98	7.88	585	519	511	512	5.34	3.83	3.31	2.91	2.52	35	62	64	80			1.514
14	21	1	1	0.15	3	0.01	3	282	286	178	200	151	7.13	7.95	7.94	7.78	585	515	494	498	5.2	3.61	3.02	2.6	2.23	35	70	72	82			1.54
